# Supplementary material
Source: PubMed Central journal article supplement (PMC6904825)
Supplement: mmc1.pdf [file mmc1.pdf]

YMTHE, Volume 27

## **Supplemental Information**

### **Increased Survival by Pulmonary Treatment of Established Lung Metastases with Dual STAT3/CXCR4 Inhibition by siRNA Nanoemulsions**

**Zhaoting Li, Gang Chen, Ling Ding, Yixin Wang, Chenfei Zhu, Kaikai Wang, Jing Li, Minjie Sun, and David Oupicky**

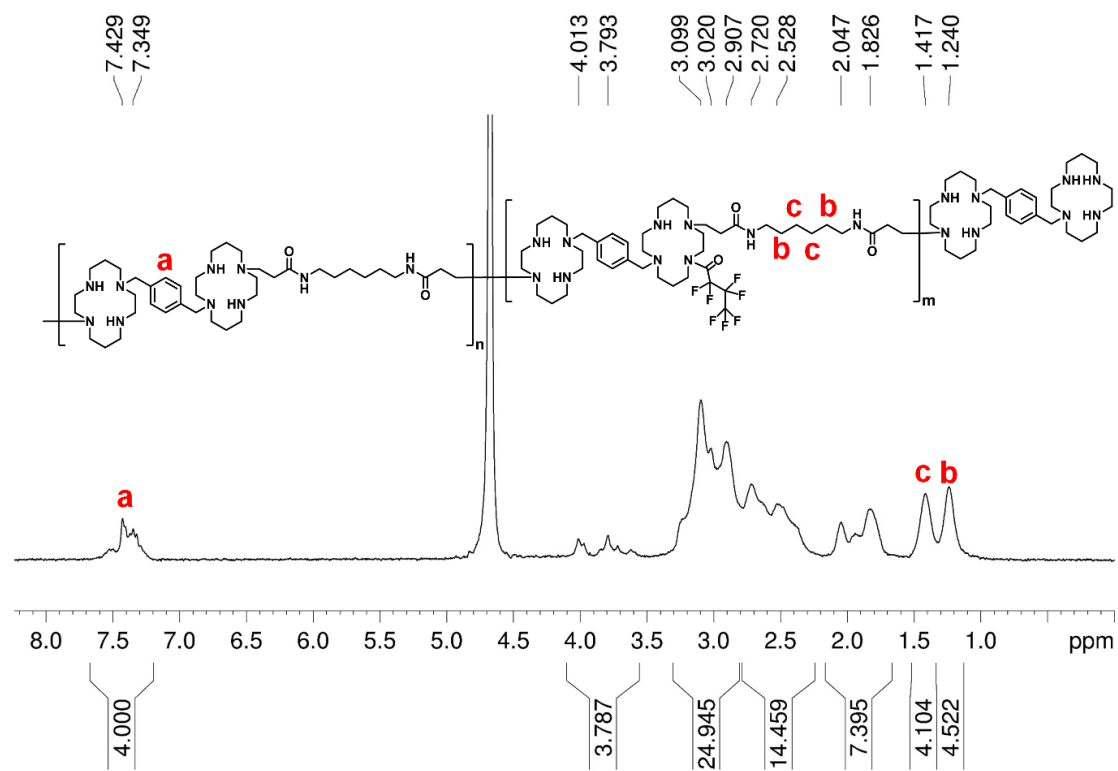

**Figure S1.** <sup>1</sup>H NMR spectrum of FM.

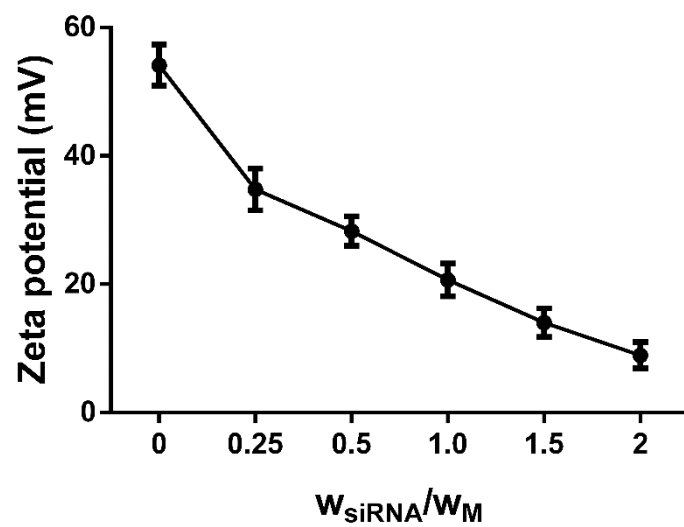

**Figure S2.** Zeta potential of FM@PFC/siRNA nanoemulsions at varying siRNA/M w/w ratios.
